# Supplementary material for: Evaluation of Fungicides and Fungicide Application Methods to Manage Phytophthora Blight of Pigeonpea
Source: MDPI journal article supplement (doi:10.3390/agriculture13030633), 2023-03-07
Supplement: s1 [file s1]

**Table S1.** Evaluation of different fungicides concentrations on radial growth of *P. cajani*

| metiram +<br>dimethomorph |                     | cymoxanil +<br>mancozeb |        | famoxadone +<br>cymoxanil |        | mancozeb |        | metalaxyl-M +<br>mancozeb |        |
|---------------------------|---------------------|-------------------------|--------|---------------------------|--------|----------|--------|---------------------------|--------|
| Dose <sup>a</sup>         | Growth <sup>b</sup> | Dose                    | Growth | Dose                      | Growth | Dose     | Growth | Dose                      | Growth |
| 0                         | 68.2                | 0                       | 66.5   | 0                         | 65.4   | 0        | 64.7   | 0                         | 65.8   |
| 0.1                       | 43.8                | 0.1                     | 63.8   | 0.1                       | 52.3   | 0.1      | 60.6   | 0.1                       | 64.4   |
| 0.25                      | 24.1                | 1                       | 50.4   | 1                         | 42.1   | 1        | 58     | 1                         | 45     |
| 0.35                      | 22.9                | 10                      | 40.5   | 10                        | 32.1   | 2.5      | 57.9   | 10                        | 18.3   |
| 0.45                      | 1.8                 | 25                      | 27.9   | 100                       | 12.5   | 5        | 57     | 25                        | 3.8    |
| 0.5                       | 0                   | 50                      | 2.6    | 120                       | 9.5    | 7.5      | 51.6   | 35                        | 0      |
| 0.75                      | 0                   | 60                      | 0      | 130                       | 3.5    | 10       | 43.5   | 45                        | 0      |
| 1                         | 0                   | 70                      | 0      | 140                       | 0      | 25       | 30.2   | 50                        | 0      |
| 10                        | 0                   | 75                      | 0      |                           |        | 50       | 19.3   | 75                        | 0      |
| 100                       | 0                   | 100                     | 0      |                           |        | 75       | 7.2    | 100                       | 0      |
|                           |                     |                         |        |                           |        | 100      | 0      |                           |        |

<sup>a</sup> Concentration of the product in µg/ml; <sup>b</sup> Radial growth of the mycelium in mm

**Table S2.** Summary of analysis of variance (ANOVA) of different fungicides (A) and their time of applications (B) during sporangia and zoospore formation in *P. cajani* under *in vitro* condition

| Growth stage | Parameters   | Interaction | F value | Pr (>F)             | CD    |       | CV    |
|--------------|--------------|-------------|---------|---------------------|-------|-------|-------|
|              |              |             |         |                     | 5%    | 1%    |       |
| Sporangia    | Total number | A           | 286.79  | < 2e-16 ***         | 0.235 | 0.313 | 11.75 |
|              |              | B           | 97.79   | < 2e-16 ***         | 0.192 | 0.256 |       |
|              |              | A × B       | 17.41   | <1.7e-14 ***        | 0.469 | 0.627 |       |
|              | Viable       | A           | 235.78  | < 2e-16 ***         | 0.289 | 0.386 | 16.52 |
|              |              | B           | 40.07   | <4.07e-13 ***       | 0.236 | 0.315 |       |
|              |              | A × B       | 6.27    | <4.90e-07 ***       | 0.579 | 0.773 |       |
|              | Non-viable   | A           | 17.55   | <7.50e-10 ***       | 0.229 | 0.306 | 25.32 |
|              |              | B           | 16.13   | <2.19e-07 ***       | 0.187 | 0.25  |       |
|              |              | A × B       | 5.37    | <3.86e-06 ***       | 0.458 | 0.612 |       |
|              | Abnormal     | A           | 10.26   | <9.93e-07 ***       | 0.178 | 0.237 | 23.28 |
|              |              | B           | 9.43    | <5.24e-05 ***       | 0.145 | 0.194 |       |
|              |              | A × B       | 4.30    | <5.57e-05 ***       | 0.355 | 0.474 |       |
| Zoospores    | Total number | A           | 452.44  | <2e-16 ***          | 0.235 | 0.313 | 11.41 |
|              |              | B           | 76.09   | <2e-16 ***          | 0.192 | 0.256 |       |
|              |              | A × B       | 50.31   | <2e-16 ***          | 0.47  | 0.627 |       |
|              | Motile       | A           | 944.54  | <2e-16 ***          | 0.179 | 0.239 | 10.36 |
|              |              | B           | 95.40   | <2e-16 ***          | 0.146 | 0.195 |       |
|              |              | A × B       | 60.09   | <2e-16 ***          | 0.359 | 0.479 |       |
|              | Encysted     | A           | 44.05   | <2e-16 ***          | 0.206 | 0.275 | 19.71 |
|              |              | B           | 23.65   | <1.53e-09 ***       | 0.168 | 0.225 |       |
|              |              | A × B       | 16.41   | <5.32e-14 ***       | 0.412 | 0.55  |       |
|              | Germinated   | A           | 2.268   | 0.063•              | 0.088 | 0.118 | 14.58 |
|              |              | B           | 2.042   | 0.121 <sup>ns</sup> | 0.072 | 0.096 |       |
|              |              | A × B       | 2.721   | 0.005**             | 0.176 | 0.236 |       |

A: three replicative data of six treatments including five fungicides (metiram + dimethomorph, cymoxanil + mancozeb, famoxadone + cymoxanil, mancozeb, metalaxyl-M + mancozeb) and a water control were used for Analysis of variance (ANOVA). EC<sub>50</sub> value amount fungicides was added to the growth media (for details refer to Table 1)

B: The fungicides were applied to the media at four different time points (T<sup>1</sup>-T<sup>4</sup>) during sporangia and zoospores formation (for details refer to table 2 and 3).

Significant codes: \*\*\*0.001; \*\*0.01; •0.1; <sup>ns</sup> non-significant.

CD: Critical differences were calculated in both 5% and 1% confidence level.

CV: Coefficient of variant was estimated for each individual parameter based on interaction between fungicides and their different time of applications

**Table S3.** Effect of different fungicides and fungicide application methods on controlling of Phytophthora blight on susceptible ICP 7119 cultivar

| <b>Fungicide application methods</b>  | <b>Fungicides</b>      | <b>Per cent disease incidence</b> |
|---------------------------------------|------------------------|-----------------------------------|
| Seed-treatment (ST)                   | metiram + dimethomorph | 40.2                              |
|                                       | cymoxanil + mancozeb   | 52.9                              |
|                                       | famoxadone + cymoxanil | 56.3                              |
|                                       | mancozeb               | 45.1                              |
|                                       | metalaxyl-M + mancozeb | 31.5                              |
| Soil-drench (SD)                      | metiram + dimethomorph | 32.3                              |
|                                       | cymoxanil + mancozeb   | 31.0                              |
|                                       | famoxadone + cymoxanil | 51.3                              |
|                                       | mancozeb               | 33.4                              |
|                                       | metalaxyl-M + mancozeb | 21.9                              |
| Foliar-spray (FS)                     | metiram + dimethomorph | 36.6                              |
|                                       | cymoxanil + mancozeb   | 55.1                              |
|                                       | famoxadone + cymoxanil | 65.2                              |
|                                       | mancozeb               | 74.9                              |
|                                       | metalaxyl-M + mancozeb | 40.4                              |
| Seed-treatment + Soil-drench (ST+ SD) | metiram + dimethomorph | 11.6                              |
|                                       | cymoxanil + mancozeb   | 15.8                              |
|                                       | famoxadone + cymoxanil | 16.3                              |
|                                       | mancozeb               | 11.3                              |
|                                       | metalaxyl-M + mancozeb | 6.6                               |
| Soil-drench + Foliar-spray (SD +FS)   | metiram + dimethomorph | 22.0                              |
|                                       | cymoxanil + mancozeb   | 23.9                              |
|                                       | famoxadone + cymoxanil | 27.8                              |
|                                       | mancozeb               | 23.8                              |
|                                       | metalaxyl-M + mancozeb | 8.6                               |

**Table S4.** Analysis of variance (ANOVA) for evaluation of different fungicides and their different application methods for controlling of Phytophthora blight in different pigeonpea cultivars.

| Source of variation              | Df | Sum Sq  | Mean Sq | F value | Pr(>F)                       |
|----------------------------------|----|---------|---------|---------|------------------------------|
| Methods <sup>‡</sup>             | 2  | 7201.2  | 3600.6  | 68.6023 | < 2.2x10 <sup>-16</sup> ***  |
| Fungicides <sup>#</sup>          | 3  | 994     | 331.3   | 6.3129  | 0.0005922***                 |
| Cultivars <sup>§</sup>           | 3  | 12202.2 | 4067.4  | 77.4964 | < 2.2 x10 <sup>-16</sup> *** |
| Methods × Fungicides             | 6  | 1345    | 224.2   | 4.2709  | 0.0007402***                 |
| Methods × Cultivars              | 6  | 7325.9  | 1221    | 23.2634 | < 2.2 x10 <sup>-16</sup> *** |
| Fungicides × Cultivars           | 9  | 789.6   | 87.7    | 1.6717  | 0.1064015 <sup>ns</sup>      |
| Methods × Fungicides × Cultivars | 18 | 1802.7  | 100.2   | 1.9082  | 0.0238056*                   |
| Residuals                        | 96 | 5038.6  | 52.5    |         |                              |

<sup>‡</sup>Three different fungicide application methods (seed-treatment + soil-drench, soil-drench + foliar-spray and soil-drench alone). <sup>#</sup>Four fungicides (metiram + dimethomorph, cymoxanil + mancozeb, famoxadone + cymoxanil, mancozeb, and metalaxyl-M + mancozeb). <sup>§</sup>Three moderately resistant (ICPL 20135, ICPL 99010, ICPL 99048) and a susceptible (ICP 7119) pigeonpea cultivars. Df: Degrees of freedom. Significant codes: \*\*\*0.001; \* 0.05; <sup>ns</sup> non-significant.

**Table S5.** Evaluation of Fungicide application methods and fungicides to manage the Phytophthora blight on different pigeonpea cultivars.

| Fungicide application methods        | Fungicides             | Cultivars  | Per cent disease incidence |
|--------------------------------------|------------------------|------------|----------------------------|
| Soil-drench (SD)                     | metiram + dimethomorph | ICP 7119   | 18.00                      |
|                                      |                        | ICPL 20135 | 6.09                       |
|                                      |                        | ICPL 99010 | 1.67                       |
|                                      |                        | ICPL 99048 | 8.57                       |
|                                      | cymoxanil + mancozeb   | ICP 7119   | 25.59                      |
|                                      |                        | ICPL 20135 | 12.57                      |
|                                      |                        | ICPL 99010 | 5.98                       |
|                                      |                        | ICPL 99048 | 14.26                      |
|                                      | mancozeb               | ICP 7119   | 23.37                      |
|                                      |                        | ICPL 20135 | 11.96                      |
|                                      |                        | ICPL 99010 | 1.67                       |
|                                      |                        | ICPL 99048 | 7.52                       |
|                                      | metalaxyl-M + mancozeb | ICP 7119   | 14.61                      |
|                                      |                        | ICPL 20135 | 7.98                       |
|                                      |                        | ICPL 99010 | 1.67                       |
|                                      |                        | ICPL 99048 | 1.67                       |
| Seed-treatment + Soil-drench (ST+SD) | metiram + dimethomorph | ICP 7119   | 9.27                       |
|                                      |                        | ICPL 20135 | 6.21                       |
|                                      |                        | ICPL 99010 | 1.90                       |
|                                      |                        | ICPL 99048 | 1.88                       |
|                                      | cymoxanil + mancozeb   | ICP 7119   | 7.98                       |
|                                      |                        | ICPL 20135 | 5.87                       |
|                                      |                        | ICPL 99010 | 1.90                       |
|                                      |                        | ICPL 99048 | 5.37                       |
|                                      | mancozeb               | ICP 7119   | 8.16                       |
|                                      |                        | ICPL 20135 | 6.21                       |
|                                      |                        | ICPL 99010 | 1.93                       |
|                                      |                        | ICPL 99048 | 1.89                       |
|                                      | metalaxyl-M + mancozeb | ICP 7119   | 1.90                       |
|                                      |                        | ICPL 20135 | 1.90                       |
|                                      |                        | ICPL 99010 | 1.91                       |
|                                      |                        | ICPL 99048 | 1.89                       |
| Soil-drench + Foliar-spray (SD+FS)   | metiram + dimethomorph | ICP 7119   | 9.80                       |
|                                      |                        | ICPL 20135 | 6.49                       |
|                                      |                        | ICPL 99010 | 1.67                       |
|                                      |                        | ICPL 99048 | 8.81                       |
|                                      | cymoxanil + mancozeb   | ICP 7119   | 6.66                       |
|                                      |                        | ICPL 20135 | 9.27                       |
|                                      |                        | ICPL 99010 | 1.67                       |
|                                      |                        | ICPL 99048 | 7.26                       |
|                                      | mancozeb               | ICP 7119   | 4.21                       |
|                                      |                        | ICPL 20135 | 1.67                       |
|                                      |                        | ICPL 99010 | 10.08                      |
|                                      |                        | ICPL 99048 | 8.81                       |
|                                      | metalaxyl-M + mancozeb | ICP 7119   | 6.09                       |
|                                      |                        | ICPL 20135 | 6.35                       |
|                                      |                        | ICPL 99010 | 3.83                       |
|                                      |                        | ICPL 99048 | 8.81                       |
